# Supplementary figures and images for: Se@Albumin nanoparticles ameliorate intestinal mucositis caused by cisplatinviagut microbiota-targeted regulation
Source: Royal Society of Chemistry journal article supplement (doi:10.1039/d0nr07981b), 2021-01-01

A

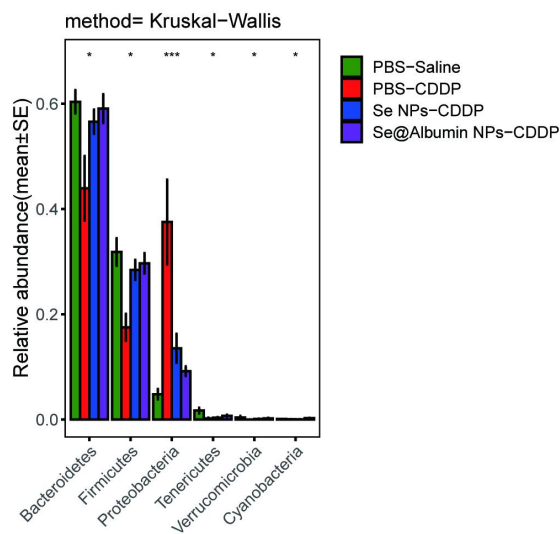

B

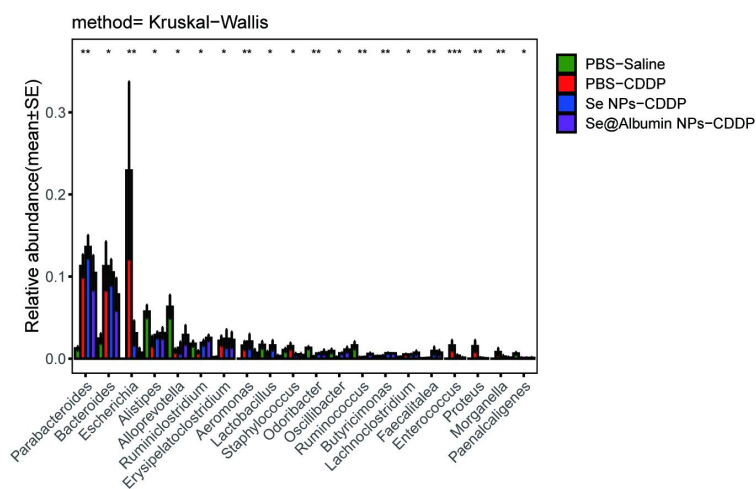

plot top 20

Supplement: d0nr07981b2.pdf [file d0nr07981b2.pdf]
